# Supplementary material for: A Review of the Methodology, Taxonomy, and Definitions in Recent fMRI Research on Meditation
Source: Springer Nature journal article supplement (doi:10.1007/s12671-021-01782-7), 2021-11-12
Supplement: MOESM1 [file 19862984]

**Supplementary materials**

**Supplementary table S1**Research description

| Aims/Hypotheses | Research Method | Results/Interpretation | Reference |
| --- | --- | --- | --- |
| Aim: to test “whether mindfulness meditation training increases DMN-dlPFC rsFC” and “whether rsFC alterations prospectively explain improvements in interleukin (IL)-6”  Hypotheses:  After meditation training*:* altered “rsFC of brain networks implicated in mind wandering (DMN) and executive control, which, in turn, improves emotion regulation, stress resilience, and stress-related health outcomes in at-risk patient populations” | PART: Unemployed job-seeking adults without serious mind-body practice  MM: 3-day residential retreat: mindfulness or relaxation  DESIGN: Resting state  AM: Plasma IL-6  ANA: ROI-to-ROI FC: PCC, ACC, middle frontal cortex (proxy for dlPFC)  ANA: Mediation analysis  EXP: Post-scanning verbal confirmation of no meditation/ relaxation activities during fMRI (confirmatory) | After meditation training: Increased FC between DMN and “a region known to be important in top-down executive control at rest (left dlPFC), which, in turn, is associated with improvements in a marker of inflammatory disease risk”  Results “suggest that a process-oriented focus on the self during meditation may shift intranetwork DMN rsFC toward internetwork connectivity, coupling DMN with regions in the executive control network” | Creswell et al., 2016 |
| Aim: to investigate the role of the triple network (DMN, SN, CEN) in mindfulness  Hypotheses:  - “the partial regression coefficient (i.e., slope) from the SN to the DMN, mediated by CEN, would be one of the potential mindfulness features …”  - “this slope level may be enhanced by real time fMRI-neurofeedback training” | PART: Mindfulness meditation naïve participants  MM: 10-days mindfulness and mind-wandering training; every second day, 5 days each  DESIGN: Mindfulness of breathing & mind wandering; Cognitive tasks/Resting state  (Word-by-word instructions)  ANA: Mediation analysis ROI-to-ROI: SN, DMN, CEN  EXP: During scanning subjective experience rating of mindfulness and task performance (results statistically analysed) | 1. Hypotheses confirmed  In experimental group (contingent neurofeedback):  2. Triple network slope was associated with mindfulness and with task-performance.  3. Increased slope from SN to DMN, mediated by CEN. | Kim et al., 2019 |
| Aims/Hypotheses | **Research Method** | **Results/Interpretation** | **Reference** |
| Aim: “to combine structural and functional approaches to understand the neural underpinnings of the effects produced by a mindfulness-based health and wellness intervention”  Hypotheses:  After mindfulness intervention*:* changes in somatomotor and insular cortices. | PART: Students (previous meditation experience not stated)  MM: 6-week mindfulness program  DESIGN: Resting state  AM: Structural MRI  AM: Mindful Attention and Awareness Scale (pre and post scanning)  ANA: Seed-to-voxel FC: Left posterior insula (based on structural findings)  ANA: Rank order analysis | After mindfulness program:  1. Increased rsFC between the left posterior insula and the right ventrolateral prefrontal cortex and the left middle and superior temporal gyri.  2. Increased rsFC between the left posterior insula and the right ventrolateral prefrontal cortex predicted increases in dispositional mindfulness.  “the observed increases in rsFC between a region involved in early auditory processing (the posterior insula) and regions involved in further analysis and monitoring of acoustic and multimodal semantic information (…) suggest a mechanistic account of increases in present-moment sensory awareness” | Mooneyham et al., 2017 |
| Aim: to compare internal attention with external attention meditation  Hypotheses:  During all mindful attention: reduced DMN activity (mind-wandering), or  Only during external attention*:* reduced DMN activity  During all mindful attention: activity in insula, ACC, dlPFC (attention)  After mind-wandering: activity in lateral PFC and thalamus (attention shifting) | PART: Meditation naïve participants  MM: Short training: focused attention meditation with thought probes  DESIGN: Internal attention meditation (mindfulness of breathing), external attention meditation (mindfulness of sound, mind-wandering, refocusing  AM: Freiburg mindfulness inventory  ANA: GLM, whole-brain analysis  EXP: During fMRI indication of attention or distraction (data used in fMRI analysis) | During mindful attention:  1. Reduced activity in DMN compared to mind-wandering phases  2. Stronger deactivation in PCC during internal vs. external attention  At refocusing after mind-wandering:  3. Activity in the left inferior frontal gyrus  Results “support the theory that the DMN is associated with mind-wandering (versus mindful attention) rather than internal (versus external) orientation”  “We argue that … a reduction in PCC is related to disengagement from self-referential processing” | Scheibner et al., 2017 |
| Aims/Hypotheses | **Research Method** | **Results/Interpretation** | **Reference** |
| Aim: to compare neural activation patterns associated with mindfulness and relaxation programs  Hypotheses:  After meditation & relaxation training: activation in ventromedial PFC (“focused attention meditation and a present-centered awareness of the self”)  After meditation training*:* anterior insula (“somatosensory conscious awareness … receiving moment-to-moment inputs from a variety of somatic and sensory centers”)  After relaxation training*:* activation in lateral PFC (“cognitive control, response inhibition, …, effortful control, which is critical to create and maintain a relaxed state”) | PART: Meditation naïve participants  MM: 8-week mindfulness or relaxation program  DESIGN: guided blocks of rest, number generation, relaxing or mindful body scan  (Word-by-word instructions)  ANA: seed-to-voxel FC: ventromedial PFC, right lateral inferior frontal gyrus, anterior insula | After meditation & relaxation training:  1. Increased FC between ventromedial PFC and supplementary motor areas: “consistent with focused attention on bodily sensations and present-centered awareness of the self”  After meditation training:  2. Increased FC between anterior insula and ACC: “indicate enhanced awareness of the sensory aspects of affective experience and modulation of emotional responses to this affective experience through the neural functions of the ACC”  After relaxation training:  3. Increased FC between IFG and supplementary motor areas: “implicating inhibitory neural networks in the relaxing bodyscan meditation” | Sevinc et al., 2018 |
| Aims/Hypotheses | **Research Method** | **Results/Interpretation** | **Reference** |
| Aim: to enhance “theoretical understanding of the neural network mechanisms by which meditation training influences affective processing”  Hypotheses:  After meditation training:  - increased rsFC between Raphe nuclei (subcortical affective networks) and PCC/precuneus (self-referential processing)  - reduced rsFC between PCC/precuneus and somatosensory cortex and/or posterior insula  - changed rsFC that mediates affective rating changes  - moderation of the association between rsFC and affective rating changes | PART: Meditation naïve participants, elderly adults  MM: 8-week attention-based compassion meditation or relaxation program  DESIGN: Resting state  AM: Arousal and valence ratings  ANA: Seed-to voxel FC: PCC/precuneus  ANA: ROI-to-ROI FC: PCC/precuneus, Raphe nuclei  ANA: Dynamic causal modelling  ANA: Mediation analysis | After meditation training:  1. Increased rsFC between from the pons (Raphe nuclei) and the PCC/ precuneus “indicate meditation promotes self-referential affective regulation based on increased regulatory influence of the pons on PCC/precuneus”  2. Changes rsFC predicted changes in affective processing  Results “indicate an enhanced self-referential affective regulatory system, possibly following a shift from a narrative, self-evaluative approach to a non-judgmental, self-aware approach”  Increased pons-precuneus FC “… may be central to the overarching effect of meditation training on the neural affective network, underlying the increase in positive self-representation, self-esteem and self-acceptance” | Shao et al., 2016 |
| Aim: to investigate meditation training-induced brain pattern changes  Hypotheses:  After meditation training: altered functional connections “in the large-scale whole-brain resting-state networks including areas associated with attention, cognitive and emotional processing, awareness and sensory integration, and reward processing” | PART: Meditation naïve participants, students  MM: 2-week program: integrative body-mind training  DESIGN: Resting state  ANA: Multivariate pattern analysis, whole-brain analysis | After meditation training:  1. Increased positive FC in occipital gyrus, frontale operculum, superior temporal gyrus, right superior temporal pole, insula, caudate and cerebellum  Results in “large scale brain networks … involve a portion of the neural circuitry supporting attention, cognitive and affective processing, awareness and sensory integration and reward processing”  “One possibility might be that when meditators close eyes and focus on the inside world, the sensory processes are amplified. When they continuously observe the inner thoughts entwined with mental images, the mental processes of visual areas are heavily involved” | Tang et al., 2017 |
| Aims/Hypotheses | **Research Method** | **Results/Interpretation** | **Reference** |
| Aim and Hypotheses: “Here, we test whether mindfulness training interventions foster executive control by strengthening functional connections between dlPFC – a hub of the executive control network ­– and frontoparietal regions that coordinate executive function” | PART: Unemployed job-seeking adults (previous meditation experience not stated)  MM: 3-day residential retreat: mindfulness or relaxation  DESIGN: Resting state  ANA: Seed-to-voxel FC: dlPFC. ROIs = Intraparietal sulcus, frontal and supplementary eye fields, posterior parietal cortex, temporoparietal junction, ventro-lateral PFC, and inferior frontal gyrus.  EXP: Post-scanning verbal confirmation of no sleep, meditation, and relaxation during fMRI (confirmatory) | After meditation training:  1. Increased rsFC between dlPFC and dorsal stream regions  2. Increased rsFC between dlPFC and the right IFG  Results “suggests that the focused attention trained by mindfulness may be enhancing the ability of dlPFC to exert top-down control for attention and action selection via strengthening of this dorsal neural circuit”  “supports the theory that mindfulness training strengthens a resting state ventral control pathway for salience processing and emotion regulation. We postulate that at the behavioral level, mindfulness causes this effect by training open monitoring skills, which promote active awareness and maintenance of internal and external stimuli as they arise” | Taren et al., 2017 |
| Aims/Hypotheses | **Research Method** | **Results/Interpretation** | **Reference** |
| Aim: to investigate differences in brain activation during meditation after mindfulness training  Hypotheses:  After meditation training:“Changes in activation in areas related to attention, inhibitory control, task-related efficiency and to the resting state network” | PART: Meditation naïve participants  MM: 8-week mindfulness program  DESIGN: mindfulness of breathing, body scan, rest (audio instructions)  ANA: GLM, ROIs = Implicit-explicit masking based on previous analysis  EXP: Post-scanning questionnaires on meditative experience during fMRI (results statistically analysed) | After meditation training:  1. Increased activation in dlPFC and left caudate/anterior insula  2. Decreased activation in DMN  “Thus a brief mindfulness training caused increased activation in areas involved in sustaining and monitoring the focus of attention (dlPFC), consistent with the aim of mindfulness that is exercising focused attention mechanisms, and in the left caudate/anterior insula involved in attention and corporeal awareness and decreased activation in areas part of the default mode network and is involved in mentalizing (rostral PFC), consistent with the ability trained by mindfulness of reducing spontaneous mind wandering” | Tomasino & Fabbro, 2016 |
| Aim: to investigate mindfulness related functional brain changes in meditation-naïve participants.  Hypotheses:  - a short course of mindfulness practice would change neural activity in the brain regions related to attention and executive  function, especially frontal-parietal regions  - a reduced recruitment of the DMN would be observed in practitioners. | PART: Meditation naïve participants  MM: 8-week mindfulness program  DESIGN: resting state  AM: Five Facet Mindfulness Questionnaire & the Positive and Negative Affect Schedule (PANAS)  ANA: ReHo, whole-brain analysis & ROIs = 11 DMN subregions  ANA: Seed-to-voxel FC: Seed based on ReHo analysis | After mindfulness intervention:  1. Increased local synchrony (ReHo values) in the bilateral parietal lobe  2. Reduced synchrony (ReHo values) in the PCC, precuneus, and cuneus,  3. Increased FC between the left postcentral gyrus and the midcingulate gyrus, insula, and precentral gyrus of the left side  “… the increased involvement of the superior parietal cortex may explain the MBSR group’s ability to selectively attend to their internal and external environment with awareness”  “… our findings … raise the possibility that parietal regions may subserve the improved processing of cognitive and emotional information observed with mindfulness” | Xiao et al., 2019 |
| Aims/Hypotheses | **Research Method** | **Results/Interpretation** | **Reference** |
| Aim: to investigate “how mindfulness meditation training can have antidepressant effects via plastic changes in both resting  state and meditation state brain activity”  Hypotheses:  After meditation training: changes in  - pregenual and dorsal ACC connectivity (“target regions for specific symptoms in depression related to mindfulness and emotional/interoceptive awareness”)  - internal consistency of the DMN (“support internally oriented and self-referential thoughts”)  - regional synchronization | PART: Meditation naïve participants, students  MM: 8-week mindfulness program  DESIGN: meditation & resting state  ANA: Seed-to-voxel FC: pregenual ACC, dorsal ACC  ANA: ICA: DMN component  ANA: ReHo | During meditation:  1. Increased DMN FC of precuneus and TPJ  2. Decreased DMN FC of frontal brain regions  3. Reduced FC between dorsal ACC and anterior insula  After meditation training:  4. Reduced rsFC between the pregenual ACC and dorsomedial PFC  Results of increased connectivity fits “... very well ... together with an improvement of open monitoring behavior such as present moment awareness,” and fits “equally well ... into potential antidepressant efficacy reversing narrowed or biased attention”  “Critically, our results may provide insight into the brain circuits that potentially subserve the plastic antidepressant effects of mindfulness meditation training” | Yang et al., 2016 |
| Aims/Hypotheses | **Research Method** | **Results/Interpretation** | **Reference** |
| Aim: to compare meditation trait, state, and state-to trait conditions in experienced meditators  Hypotheses:  “brain activation in nodes of the CEN during meditation would: (1) modulate activity of the DMN and increase connectivity between DMN and CEN,  (2) these changes would persist after meditation and finally,  (3) that there are trait differences in DMN and CEN activity and connectivity characteristic of meditation experience” | PART: Long-term meditators + meditation naïve participants  MM: Vipassana  DESIGN: Pre-resting state; meditation state: post-resting state  ANA: FALFF  ANA: seed-to-voxel FC: medial prefrontal cortex (DMN), inferior frontal gyrus (CEN), inferior parietal lobe (CEN) based on FALFF results.  ANA: Positive diametric activity | Meditation trait:  1. Significant reduction in activity and FC within DMN  2. Increased anticorrelations between DMN and CEN.  Meditation state & meditation state-to-trait:  3. Increased activity and FC within the DMN and between DMN  and CEN.  “CEN negatively regulates the DMN and is probably responsible for the long-term trait changes seen in meditators and reported psychological well-being”  “… with more experience in meditation, the moments of mindfulness become so frequent that no more transitions are needed and thus become the new default mode with sustained reduction in DMN activity and connectivity without effort” | Bauer et al., 2019 |
| Aim: to investigate the spontaneous trait reactivation (STR) hypothesis  Hypotheses:  *STR:* “spontaneous fluctuations can be actively remodeled in a long-term manner by focused and intense cortical training”  rsFC compared to task-based fMRI:“observed changes in the resting-state fluctuations reflect similar changes in task-induced activations in mindfulness meditation” | PART: Long-term mindfulness meditators & meditation naïve participants  MM: Vipassana  DESIGN: resting state  ANA: ROI-to-ROI FC: precuneus and inferior parietal lobe (DMN), lateral occipital lobe and posterior fusiform gyrus (visual)  EXP: Post scanning semi-structured interview on experience during fMRI (confirmatory) | In meditators during resting-state:  1. Increased amplitude of spontaneous fluctuations in visual cortex  2. Decreased amplitude of spontaneous fluctuations in DMN  Results are “… compatible with the STR hypothesis, proposing that spontaneous fluctuations might recapitulate subtle training-induced individual differences observed during task performance”  “… could be plausibly interpreted as a long-term reduction of internal, self-related processing leading to increased environmental awareness as a result of long-term mindfulness meditation practice ...” | Berchovic-Ohana et al., 2016 |
| Aims/Hypotheses | **Research Method** | **Results/Interpretation** | **Reference** |
| Aim: to investigate “key brain regions associated with the arising of spontaneous thoughts”  Hypotheses:  Initial generation of spontaneous thought: activation in medial temporal lobe  After initial generation of spontaneous thought:increased recruitment of medial and lateral PFC. | PART: Long-term mindfulness meditators  MM: Vipassana  DESIGN: Neurophenomenology: “participants with introspective training give first-person reports about their mental processes that are then related to measures of neural activity”  DESIGN: monitoring thoughts that arise spontaneously (thought condition), monitoring words that appear on screen (word condition). During both blocks, participants attended to the rising and falling of the abdomen  ANA: GLM: whole-brain analysis  ANA: fMRI time course extraction  EXP: Subjective experience of thoughts were part of the study design. | Prior to arising of thought:  1. Signal peak in medial temporal lobe and IPL  Together with or immediately following thought:  2. Signal peak in medial PFC, temporopolar, mid-insular, lateral PFC, and dorsal ACC  Results may reflect: “… spontaneously occurring reactivation and recombination of memory traces … and … the bottom-up tuning of attention towards salient features in the internal mental stream”  “We propose that brain regions that show antecedent recruitment may be preferentially involved in the initial inception of spontaneous thoughts, while those that show later recruitment may be preferentially involved in the subsequent elaboration and metacognitive processing of spontaneous thoughts” | Ellamil et al., 2016 |
| Aims/Hypotheses | **Research Method** | **Results/Interpretation** | **Reference** |
| Aim: to understand how meditation shapes global activity through the brain  Hypotheses:  “… a brain state can be defined by measuring how the broadness of communication is elicited and distributed through the brain over time, i.e., by characterizing its underlying dynamical complexity” | PART: Long-term meditators & meditation naïve participants  MM: Vipassana  DESIGN: Resting state and meditation  ANA: Intrinsic ignition framework, whole-brain analysis | During meditation  1. Less complexity during meditation than during resting state in the meditator group but not in the control group.  In experienced meditators during resting state  2. Higher metastability (i.e., a wider dynamical regime over time) than in the control group.  “… these results demonstrate that experienced meditators can voluntarily alter their whole-brain dynamics when engaged in a meditative state. Furthermore, expertise in meditation leads to increased ignition and metastability at rest. This means that expert meditators are able to regulate the level of exploration of the dynamical  repertoire, restricting it during meditation, and enhancing it during rest” | Escrichs et al., 2019 |
| Aim: to compare “the striatal functional connectivity with both attention network regions and DMN regions” during OM and FA  Hypotheses:  OM different from FA in “the intentional focused attention” and “the involvement of memory function”  During FA: increased “relationship between the striatum and attention network regions” (increased intentional focused attention)  During OM: decreased “relationship between the striatum and attention network regions” (no intentional focused attention)  During OM:decreased “relationship between the striatum and DMN regions related to memory function” | PART: Regular meditators  MM: Vipassana  DESIGN: FA, OM, pre-resting state, post-resting state  (Word-by-word instructions)  ANA: Seed-to-voxel FC: ventral caudate (inferior)/nucleus accumbens, ventral caudate (superior), dorsal caudate, dorsal caudal putamen, dorsal rostral putamen, and ventral rostral putamen  EXP: Post-scanning rating scale on experience of meditation during fMRI (confirmatory) | During OM & FA:  1. Reduced FC between the striatum and PCC  During OM:  2. Reduced FC between ventral striatum and the visual (attention) and retrosplenial (memory) cortices  During FA:  3. Increased FC between ventral striatum and the visual and retrosplenial cortices  Results “suggest that functional connectivity changes during OM may be associated with reduced intentional focused attention and increased detachment from autobiographical memory without reacting to or judging experiences automatically and habitually” | Fujino et al., 2018 |
| Aims/Hypotheses | **Research Method** | **Results/Interpretation** | **Reference** |
| Aim: “to probe if meditation-naïve subjects show qualitatively similar somatosensory activations and reductions in CMS as meditators, during mindful self-aware states, when these are not initiated by language-related stimuli”  Hypotheses:  Both groups during mindful self-awareness: “decreased activation in CMS and amygdala and increased sensory cortex and posterior insula activation”  Group differences during mindful self-awareness*:* in above regions + dlPFC and inferior PFC | PART: Long-term meditators + meditation naïve participants  MM: Vipassana  DESIGN: Cognitive self-reflection, mindful self-awareness, rest  (Word-by-word instructions)  ANA: GLM, whole-brain analysis  ANA: % signal change: left amygdala and dlPFC, right secondary somatosensory cortex, posterior insula  EXP: During scanning - affective ratings. Post-scanning rating scale on experience of meditation during fMRI (results statistically analysed) | During mindful self-awareness in both groups:  1. Decreased CMS activation  During mindful self-awareness in meditators:  2. Decreased activation in prefrontal CMS and language areas  3. Decreased activity in language areas  Results confirm “our hypothesized down-regulation of cognitive self-referential CMS regions associated with DMN and mind-wandering during mindful self-awareness”  “… might indicate training-related changes in cognitive self-referential areas along with reduced verbalization, reflecting more skilful mindful self-awareness” in long-term meditators | Lutz et al., 2016 |
| Aim: “to present a proof of concept for the feasibility of a single-subject analysis, which allows the study of meditation effects on the brain”  Hypotheses:  After meditation training:lessened interference of DMN regions during resting state (such as the PCC/precuneus) and changes in brain regions involved in conflict monitoring and attention (ACC and dlPFC). | PART: Experienced meditator in mainly shamata practice & aikido  MM: 5.5-week retreat (Secularized Shamatha, Four Immeasurables, and Vipassana)  DESIGN: Resting state  ANA: ReHo & ALFF, whole-brain analysis | After meditation training:  1. Increased ALFF in the dorsolateral prefrontal cortex  2. Decreased ReHo in the precuneus  “it is possible to speculate that the precuneus was more active before training than after it, and that the participant was more likely to enter the state of mind-wandering before it” | Sato et al., 2017 |
| Aims/Hypotheses | **Research Method** | **Results/Interpretation** | **Reference** |
| Aim: “… to assess the effects of long-term mental training in socio-affective skills on structural brain networks”  Hypotheses:  During loving-kindness meditation:alterations in prefrontal and insular cortical networks, “relevant to the generation of loving-kindness and socio-affective processing” | PART: long-term meditators + meditation naïve participants  MM: Tibetan Buddhism (Nyingma), esp. loving-kindness and compassion  DESIGN: Loving-kindness meditation, resting state  (Word-by-word instructions)  AM: Structural MRI  ANA: ALFF, whole-brain analysis  ANA: Structure-function overlap analysis  EXP: Post-scanning rating scale on meditation state and mind wandering during fMRI (confirmatory) | During loving-kindness meditation in meditators:  1. Increased amplitude in multiple prefrontal and insular regions  2. Structure-function overlap in the left ventrolateral PFC and anterior insula  Results suggest “that these regions may play a central role in the generation of emotional states relevant for the meditative practice”  “.. loving-kindness meditation may involve the generation of positive affective states combined with a decrease in self-related processing, consistent with the altruistic, other-related motivation” | Engen et al., 2018 |
| Aim: to perform a neurophenomenological case study of Kundalini meditation.  Hypotheses:  No *a priori* hypotheses | PART: male with self-proclaimed “Kundalini” ecstatic/ euphoric experiences  MM: Spontaneous Kundalini experience  DESIGN: cued initiation of Kundalini event (ON) + self-indication of end of event (OFF)  ANA: GLM, whole-brain analysis | During Kundalini event:  1. Activation in left PFC  No specific interpretation of the finding | Modestino, 2016 |
| Aim: to investigate the influence of  control condition during mantra meditation  Hypotheses:  During mantra meditation:  - modulation of DMN activation “beyond that of a minimally active/ nonlanguage finger-tapping control condition”  - training effects over time | PART: Meditation naïve participants  MM: 2-week Kundalini yoga course  DESIGN: Mantra meditation, low-level attention finger-tapping – Longitudinal design, 3 sessions  ANA: GLM: DMN midline regions | During mantra meditation:  1. Decreased DMN activation compared to finger-tapping  2. Training effects in DMN over time  Results indicate that “mantra practice suppresses activation in these DMN regions beyond the active control task”. “… a decrease in emotional reactivity and self-referential processing following the aims of Kundalini practice” | Simon et al., 2017 |
| Aims/Hypotheses | **Research Method** | **Results/Interpretation** | **Reference** |
| Aim: to characterize “the spatial and temporal changes caused by meditation induced alterations of consciousness”  Hypotheses:  No *a priori* hypotheses | PART: Long-term meditators + meditation naïve participants  MM: Raja Yoga  DESIGN: mediation, resting state  AM: simultaneous EEG-fMRI  ANA: ICA, Component = DMN  ANA: EEG microstate analysis  EXP: Post-scanning interview on meditative state during fMRI (confirmatory) | In meditators during rest and meditation:  1. Decreased connectivity in PCC, further reduced during meditation  2. Increased connectivity in the right middle frontal and left middle temporal gyri  3. Higher duration and frequency of DMN microstate, further increased during meditation  “Human consciousness is postulated to be positioned at the verge of instability defined to lie between the multistable attractor state and the unstable spontaneous state. Within this framework, decreased variability within such a dynamical system is compatible with our finding of increased frequency of the DMN microstate during meditation” * | Panda et al., 2016 |
| Aim: to investigate the causal effects and subjective experience of short-term Sahaja Yoga practice  Hypotheses:  No *a priori* hypotheses | PART: Meditation naïve participants  MM: 4-week Sahaja Yoga course  DESIGN: Resting state  AM: Emotional self-assessment (data used in fMRI analysis)  ANA: ICA, resting state networks  ANA: Power spectra of resting state networks | After meditation training  1. Decreased power at ultra‐low frequencies (<0.02 Hz) and increased power in low–middle frequencies (<0.1 Hz) after training in frontal CEN involving the bilateral dlPFC and dorsomedial PFC, the dorsal ACC, and bilateral fronto‐insular cortex  2. Higher post‐training well‐being scores were reflected in the lower power spectra  “The significant impact of a brief meditation training on brain regions associated with attention, self‐control, and self‐awareness may reflect the engagement of cognitive control skills in searching for a state of mental silence …” | Dodich et al., 2019 |
| Aims/Hypotheses | **Research Method** | **Results/Interpretation** | **Reference** |
| Aim: “to investigate brain regions that are associated with their volume and FC with the depth of mental silence in long-term practitioners of Sahaja Yoga Meditation”  Hypotheses:  No *a priori* hypotheses | PART: long term meditators + meditation naïve participants  MM: Sahaja Yoga  DESIGN: Meditation, resting state  AM: Structural MRI  ANA: Seed-to-voxel FC: seeds based on grey matter volume results  EXP: Post-scanning rating of subjective experience of depth of mental silence (data used in fMRI analysis) | Correlation with depth of mental silence:  1. Increased grey matter volume in medial PFC/rostral ACC  During meditation:  2. Increased connectivity between medial PFC/rostral ACC and bilateral anterior insula/putamen  3. Decreased connectivity between medial PFC/rostral ACC and the right thalamus/ parahippocampal gyrus (also during rest)  Results “suggest that the depth of mental silence is associated with medial fronto-insular-striatal networks that are crucial for top-down attention and emotional control”  “We thus provide evidence for the role of medial PFC/rostral ACC as a key region that is structurally and functionally related to the maintenance of mental silence in Sahaja Yoga meditation” | Hernandez et al., 2018 |
| Aim: to explore “blood flow patterns in experienced Transcendental Meditation practitioners”  Hypotheses:  No *a priori* hypotheses | PART: Long-term meditators  MM: Transcendental Meditation  DESIGN: meditation, resting state  ANA: Analysis not clearly described  EXP: Post-scanning interview on impact of scanning on meditative experience during fMRI (confirmatory) | During meditation:  1. Higher “blood flow patterns” in anterior cingulate and dorsolateral prefrontal cortices  2. Lower “blood flow patterns” in pons and cerebellum  “A straightforward interpretation of lower blood flow in the pons is that fewer mental and physical resources are being recruited and used during Transcendental Meditation practice”  “This pattern supports the understanding that Transcendental Meditation practice requires minimal effort.” | Mahone et al., 2018 |
| Aims/Hypotheses | **Research Method** | **Results/Interpretation** | **Reference** |
| Aim: to investigate “the functional role of the insula ... in Brain Wave Vibration meditation practitioners ... to determine the association between meditation and brain function involving emotional and bodily awareness and monitoring”  Hypotheses:  In meditators: increased FC between the insula and the PFC and brain regions associated with sensory processing and emotional awareness and regulation | PART: Long-term meditators + meditation naïve participants  MM: Brain Wave Vibration meditation  DESIGN: Resting state  ANA: Seed-to-voxel FC: anterior and posterior insulae | In meditators:  1. Higher FC between the insula and the thalamus, caudate, middle frontal gyrus, and superior temporal gyrus “could be related to more efficient focused emotional attention through meditation practice”  2. Lower FC between the posterior insula and the parahippocampal gyrus “may be related to the release of negative emotion, one of the training procedures of Brain Wave Vibration”  Results “suggest that the practice of Brain Wave Vibration meditation may be associated with functional differences in regions related to focused attention, executive control, and emotional awareness and regulation” | Jang et al., 2018 |
| Aim: to examine “the two different processes involved inChinese Original Quiet Sitting”  Process 1: High energy level, “Invitation of Primordial Ch’i (IPC)”  Process 2: Middle to low energy state, “Allow its Natural Workings (ANW)”  Hypotheses:  No *a priori* hypotheses | PART: Long-term meditators  MM: Taoist  DESIGN: Resting state, IPC, ANW, control (off-state)  ANA: GLM, whole brain analysis & ROI = pineal body (based on independent study) | During low energy state (ANW):  1. Both activation and deactivation of “certain brain regions”  During high energy state (IPC):  2. Only activation of “certain brain regions.”  3. Activation in the pineal body  Results imply that “the lower energy level of the “relaxation situation” is proceeding and dominating” during ANW  “… pineal body seems to have quantum responses or certain interactions”  “Our study exhibits noticeable results about different neural energy patterns or neuro-quantum states” | Chien-Hui Liou, 2016 |
| Aims/Hypotheses | **Research Method** | **Results/Interpretation** | **Reference** |
| Aim: to explore “brain network changes related to meditation by graph theoretical analysis”  Hypotheses:  During meditation:  - “changes in consciousness” lead to “changes in nodal degree”  - “such changes in the degree of hub nodes might be related to changes in the anatomical orientation and distance of connections or edges between nodes” | PART: Long-term meditators  MM: Taoist  DESIGN: Meditation, resting state  ANA: Graph theoretical analysis, whole brain  EXP: During scanning – indication of meditative state with pneumatic ball (data used in fMRI analysis) &  Post-scanning ratings of the depth of meditation during fMRI (confirmatory) | During meditation:  1. “Extensive and expertise-dependent reorganization of the hubs (highly connected nodes) and edges (functional connections)”  2. Decreased connectivity in sensory cortex and bilateral temporopolar areas  3. Increased connectivity in thalamus and DMN  Results “suggest that transient changes in consciousness associated with meditation introduce convergent changes in the topological and spatial properties of brain functional networks, and the anatomical pattern of integration might be as important as the global level of integration when considering the network basis for human consciousness” | Jao, 2016 |

Note. PART = participants; MM = meditation method; AM = additional measures used in fMRI analysis; ANA = analysis method; EXP = subjective experience during fMRI;ACC = Anterior cingulate cortex; ALFF = Amplitude of low frequency fluctuations; CEN = Central executive network; CMS = central midline structures; dlPFC = dorsolateral prefrontal cortex; DMN = default mode network; FA = focused attention; FC = functional connectivity; GLM = General linear model; ICA = Independent component analysis; OM = Open monitoring; PCC = Posterior cingulate cortex; PFC = Prefrontal cortex; ReHO = Regional homogeneity; rsFC = resting state functional connectivity ROI = Region of interest; SN = Salience network.

* Authors explanation: “According to large scale dynamical models of consciousness, resting brain can be divided into three states, namely the spontaneous state, multistable attractor states and unstable spontaneous state, differing in their coupling strengths. The state with least coupling strength is the spontaneous state and that with highest coupling strength is the unstable spontaneous state often associated with a task.”
